# Supplementary material
Source: PubMed Central journal article supplement (PMC3904800)
Supplement: NIHMS539383-supplement-Supplementary_Data.pdf [file NIHMS539383-supplement-Supplementary_Data.pdf]

**SUPPLEMENTAL MATERIAL**

**Table 1 – Online Appendix. Baseline characteristics among 24,331 adults with heart failure and preserved or reduced left ventricular systolic function, stratified by eGFR category.**

|                                      | Overall       | eGFR 90-130 | eGFR 60-89  | eGFR 45-59  | eGFR 30-44  | eGFR 15-29  | eGFR <15    | Dialysis    | p-value |
|--------------------------------------|---------------|-------------|-------------|-------------|-------------|-------------|-------------|-------------|---------|
| Mean (SD) age, yr                    | 74.1 (12.1)   | 61.5 (12.6) | 72.5 (11.8) | 77.3 (9.8)  | 79.1 (9.6)  | 78.1 (10.5) | 74.5 (11.6) | 68.3 (12.0) |         |
| Median (interquartile) age, yr       | 76 (67,83)    | 62 (53,71)  | 74 (65,81)  | 78 (72,84)  | 80 (74,86)  | 80 (73,85)  | 76 (67,83)  | 70 (61,77)  |         |
| Age categories                       |               |             |             |             |             |             |             |             | <0.001  |
| <45                                  | 487 (2.0)     | 250 (10.2)  | 148 (1.7)   | 30 (0.5)    | 18 (0.4)    | 12 (0.6)    | 2 (0.8)     | 27 (3.7)    |         |
| 45-54                                | 1367 (5.6)    | 488 (20.0)  | 580 (6.7)   | 105 (1.8)   | 65 (1.5)    | 46 (2.3)    | 18 (7.2)    | 65 (9.0)    |         |
| 55-64                                | 3444 (14.2)   | 736 (30.1)  | 1489 (17.1) | 552 (9.5)   | 283 (6.3)   | 180 (9.1)   | 33 (13.1)   | 171 (23.7)  |         |
| 65-74                                | 6065 (24.9)   | 595 (24.4)  | 2477 (28.5) | 1347 (23.3) | 931 (20.9)  | 422 (21.2)  | 66 (26.3)   | 227 (31.4)  |         |
| 75-84                                | 8572 (35.2)   | 334 (13.7)  | 2760 (31.8) | 2537 (43.9) | 1863 (41.8) | 803 (40.4)  | 86 (34.3)   | 189 (26.2)  |         |
| ≥ 85                                 | 4396 (18.1)   | 40 (1.6)    | 1234 (14.2) | 1211 (20.9) | 1297 (29.1) | 525 (26.4)  | 46 (18.3)   | 43 (6.0)    |         |
| Female gender, n (%)                 | 11,590 (47.6) | 1353 (55.4) | 3843 (44.2) | 2674 (46.2) | 2232 (50.1) | 1035 (52.1) | 125 (49.8)  | 328 (45.4)  | <0.001  |
| Medical History <sup>+</sup> , n (%) |               |             |             |             |             |             |             |             |         |
| Prevalent heart failure              | 14,745 (60.6) | 1173 (48.0) | 4695 (54.0) | 3585 (62.0) | 3081 (69.1) | 1491 (75.0) | 167 (66.5)  | 553 (76.6)  | <0.001  |
| Left ventricular systolic function   |               |             |             |             |             |             |             |             |         |
| Preserved EF                         | 14,579 (59.9) | 1336 (54.7) | 4965 (57.1) | 3477 (60.1) | 2835 (63.6) | 1313 (66.0) | 184 (73.3)  | 469 (65.0)  | <0.001  |
| Reduced EF                           | 9752 (40.1)   | 1107 (45.3) | 3723 (42.9) | 2305 (39.9) | 1622 (36.4) | 675 (34.0)  | 67 (26.7)   | 253 (35.0)  | <0.001  |
| Acute myocardial Infraction          | 3239 (13.3)   | 257 (10.5)  | 975 (11.2)  | 801 (13.9)  | 655 (14.7)  | 348 (17.5)  | 44 (17.5)   | 159 (22.0)  | <0.001  |
| Unstable angina                      | 1700 (7.0)    | 122 (5.0)   | 556 (6.4)   | 420 (7.3)   | 365 (8.2)   | 151 (7.6)   | 16 (6.4)    | 70 (9.7)    | <0.001  |
| Coronary artery bypass surgery       | 1516 (6.2)    | 124 (5.1)   | 541 (6.2)   | 369 (6.4)   | 293 (6.6)   | 113 (5.7)   | 10 (4.0)    | 66 (9.1)    | 0.00    |
| Percutaneous coronary                | 2482 (10.2)   | 206 (8.4)   | 853 (9.8)   | 594 (10.3)  | 481 (10.8)  | 189 (9.5)   | 23 (9.2)    | 136 (18.8)  | <0.001  |
| Ischemic stroke or transient         | 2020 (8.3)    | 128 (5.2)   | 602 (6.9)   | 558 (9.7)   | 401 (9.0)   | 215 (10.8)  | 24 (9.6)    | 92          | <0.001  |
| Cerebrovascular disease              | 5204 (21.4)   | 288 (11.8)  | 1553 (17.9) | 1331 (23.0) | 1168 (26.2) | 573 (28.8)  | 75 (29.9)   | 216 (29.9)  | <0.001  |
| Other thromboembolic event           | 201 (0.8)     | 14 (0.6)    | 59 (0.7)    | 44 (0.8)    | 53 (1.2)    | 18 (0.9)    | 3 (1.2)     | 10 (1.4)    | 0.02    |
| Atrial fibrillation or flutter       | 9275 (38.1)   | 651 (26.6)  | 3294 (37.9) | 2411 (41.7) | 1940 (43.5) | 721 (36.3)  | 55 (21.9)   | 203 (28.1)  | <0.001  |
| Ventricular tachycardia or           | 770 (3.2)     | 78 (3.2)    | 298 (3.4)   | 167 (2.9)   | 137 (3.1)   | 64 (3.2)    | 7 (2.8)     | 19 (2.6)    | 0.63    |





|                                                 |              |              |             |             |             |             |           |            |        |
|-------------------------------------------------|--------------|--------------|-------------|-------------|-------------|-------------|-----------|------------|--------|
| Ace inhibitors/Angiotensin II receptor blockers | 13983 (57.5) | 1360 (55.47) | 5102 (58.7) | 3493 (60.4) | 2668 (59.9) | 951 (47.8)  | 97 (38.6) | 312 (43.2) | <0.001 |
| Beta-blocker                                    | 15239 (62.6) | 1319 (54.0)  | 5248 (60.4) | 3690 (63.8) | 2975 (66.7) | 1383 (69.6) | 178       | 446        | <0.001 |
| Diuretic (loop)                                 | 12177 (50.0) | 913 (37.4)   | 3788 (43.6) | 3013 (52.1) | 2701 (60.6) | 1373 (69.1) | 168       | 221        | <0.001 |
| Diuretic (thiazide)                             | 4282 (17.6)  | 371 (15.2)   | 1486 (17.1) | 1101 (19.0) | 896 (20.1)  | 359 (18.1)  | 42        | 27 (3.7)   | <0.001 |
